# Supplementary material for: Cleavable and removable polymer thermosets for organic field effect transistor packaging
Source: Royal Society of Chemistry journal article supplement (doi:10.1039/c3ra43320j), 2013-01-01
Supplement: c3ra43320j.pdf [file c3ra43320j.pdf]

## Supporting Information

# Cleavable and removable polymer for organic field effect transistor packaging

Arulraj Arulkashmir, Manik E Bhosale, Kothandam Krishnamoorthy\*

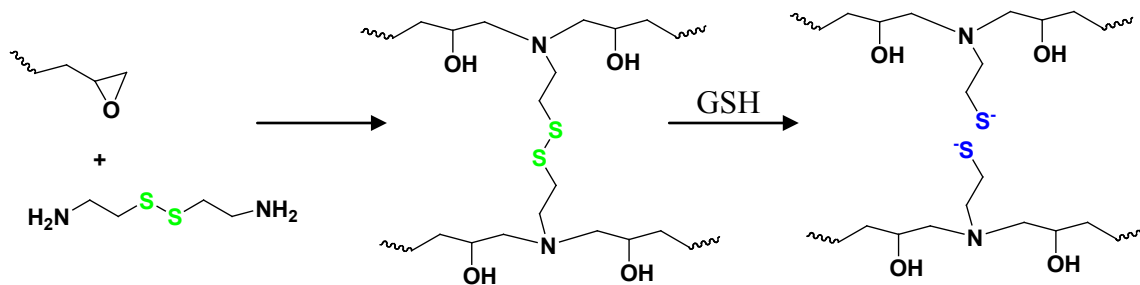

Scheme S1. Preparation of polymer thermosets

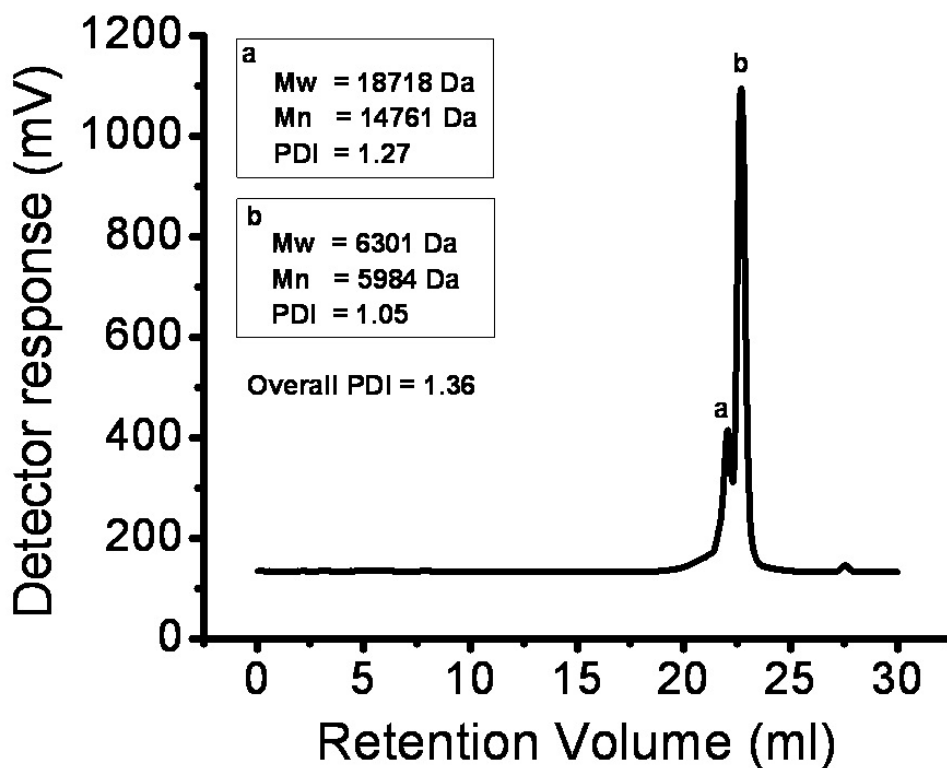

Fig. S1 Gel permeation chromatogram of epoxy resin

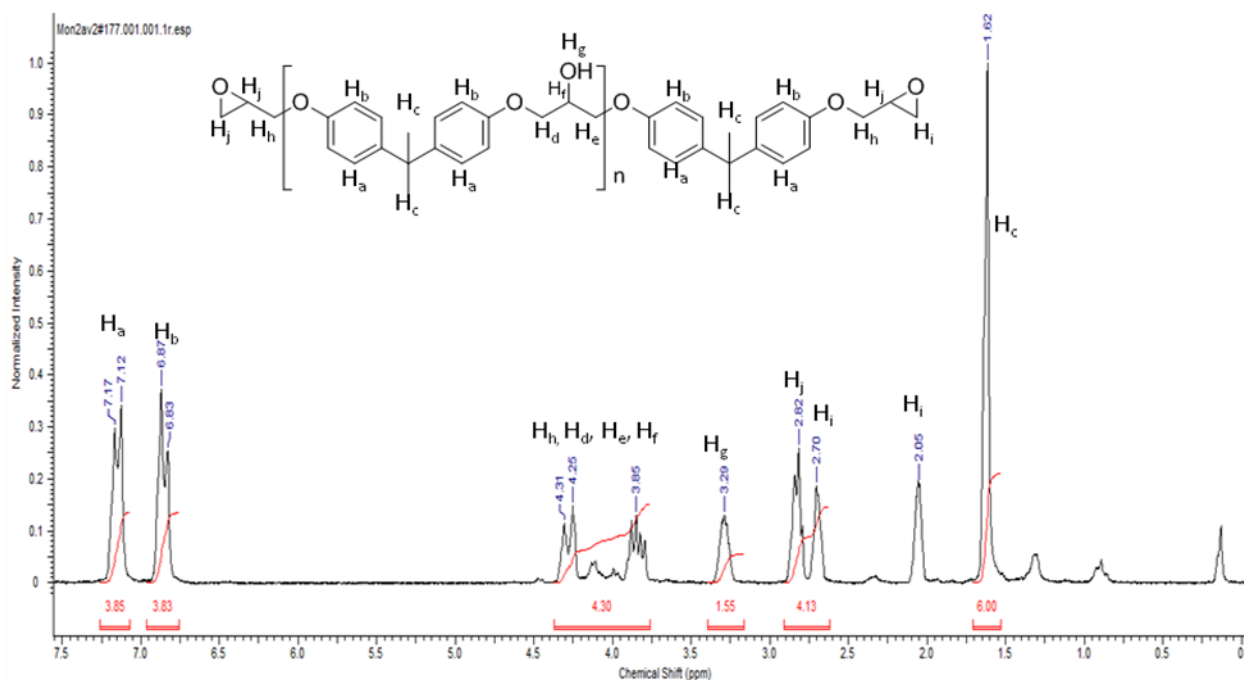

Fig. S2 <sup>1</sup>H-NMR spectrum of epoxy resin (200 MHz, Acetone-d<sub>6</sub>)

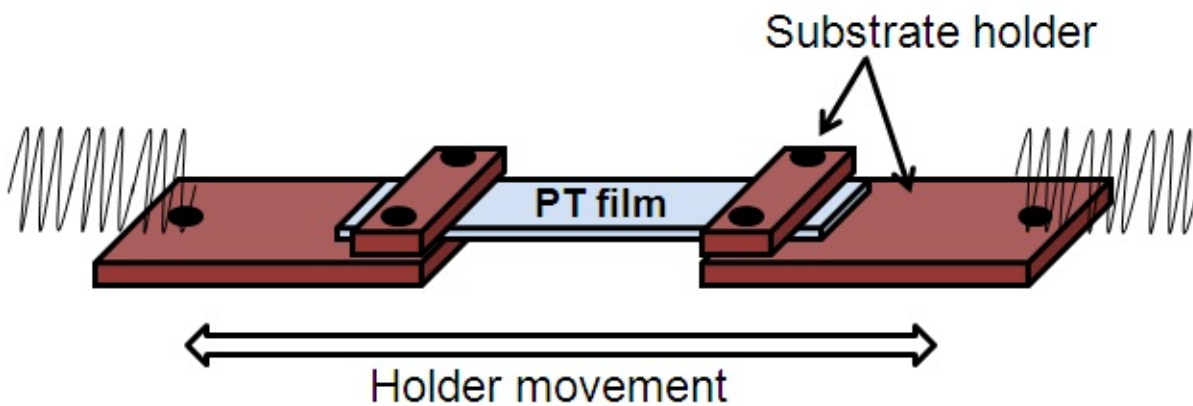

Fig. S3. Cartoon showing the experimental setup for mechanical analysis of PTs.

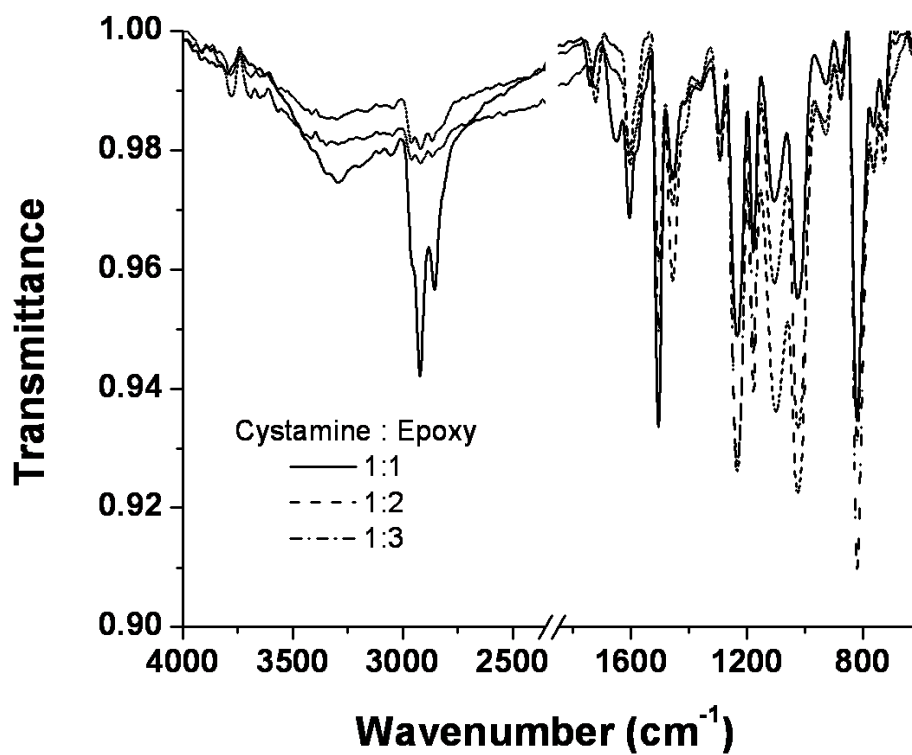

Fig. S4. ATR IR spectra of thermosets PT1, PT3 and PT5.

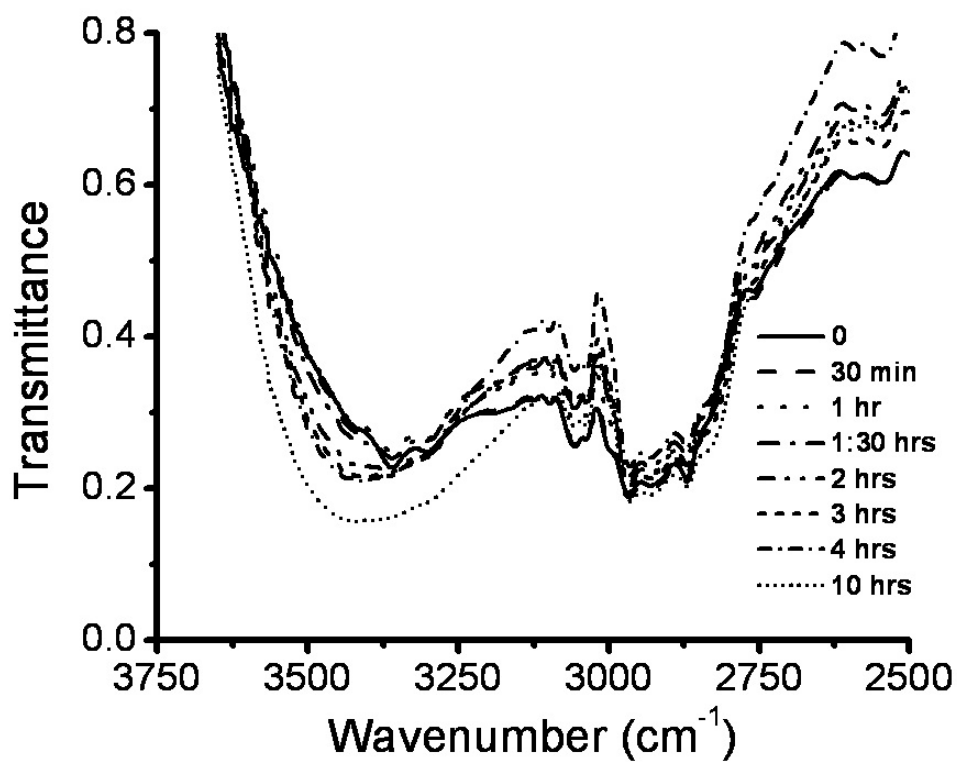

Fig. S5 ATR IR spectra of PT1 as a function of time

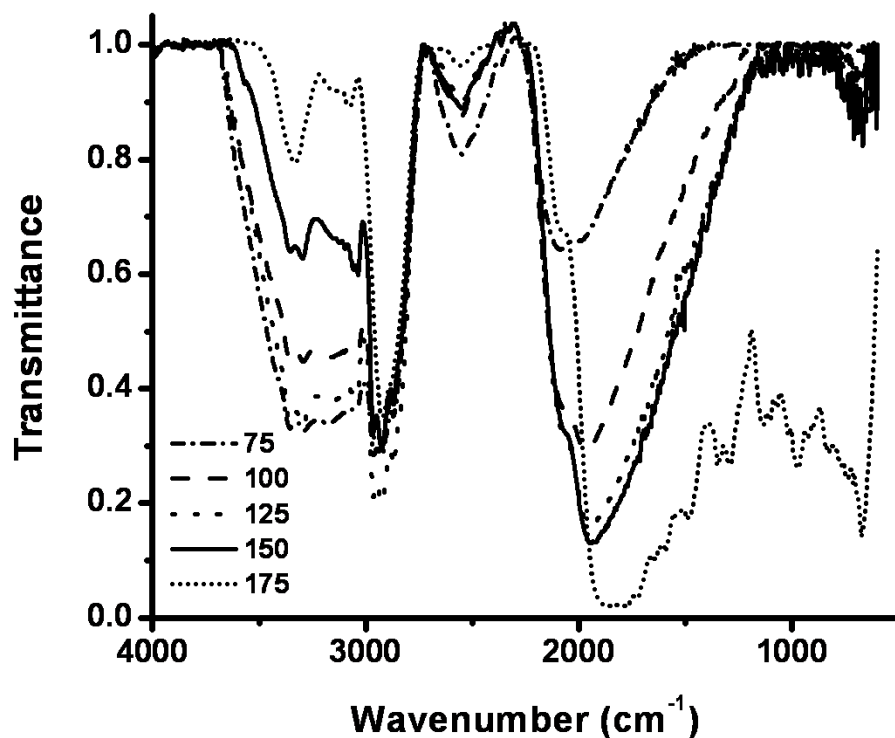

Fig. S6. ATR IR spectra of thermosets PT1 as a function of temperature.

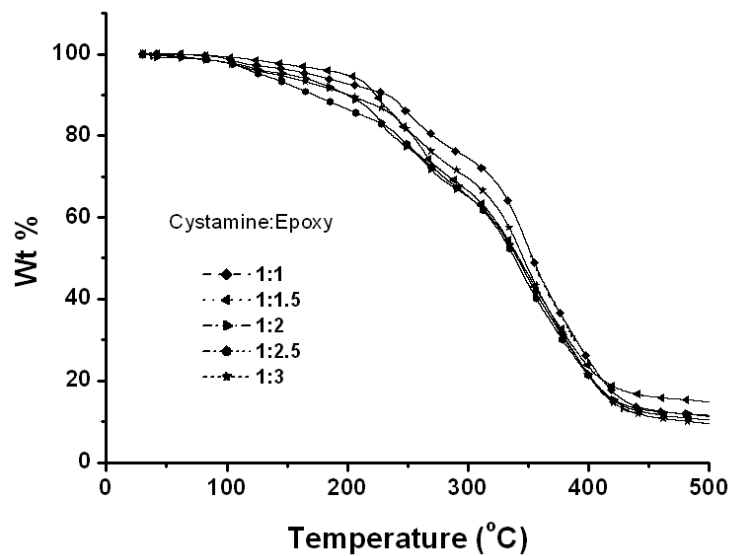

Fig. S7. Thermo gravimetric analysis showing the percentage weight loss as a function of temperature for various polymer thermoset mixtures (PT1 to PT5).

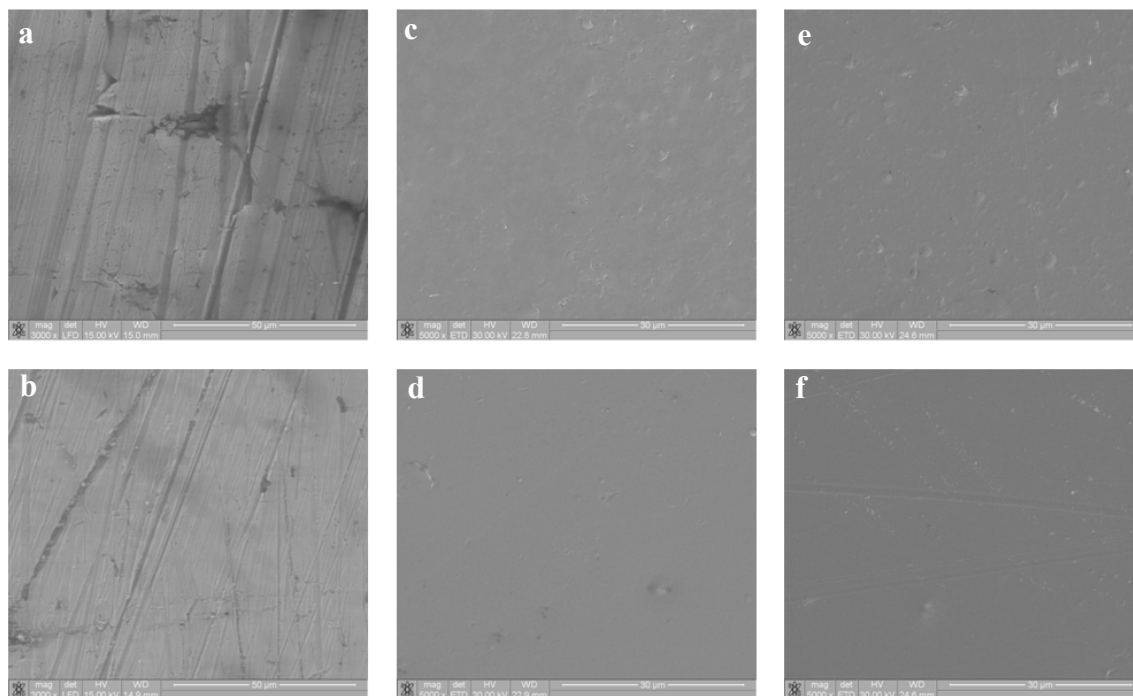

**Fig. S8.** Scanning electron microscopic (SEM) image showing before and after removal of PT1 layers from Cu (a and b), glass (c and d) and plastic (e and f) substrates without destroying the surface. After removal of PTs, the surfaces are cleaner due to washing effect.

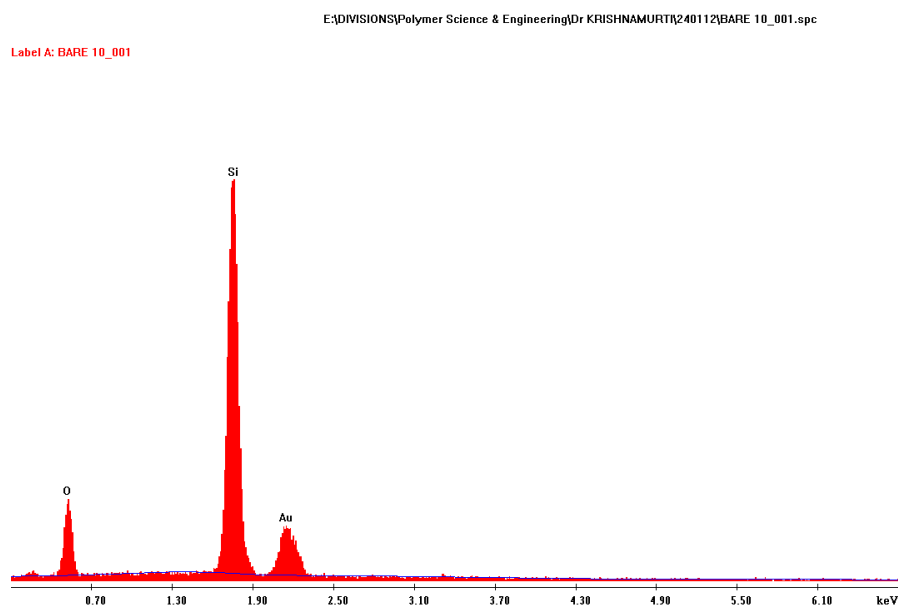

**Fig. S9.** Energy dispersive X-ray spectroscopic analysis (EDX) showing the elemental composition of normal device surface.

Label A: EPOXY 10\_001

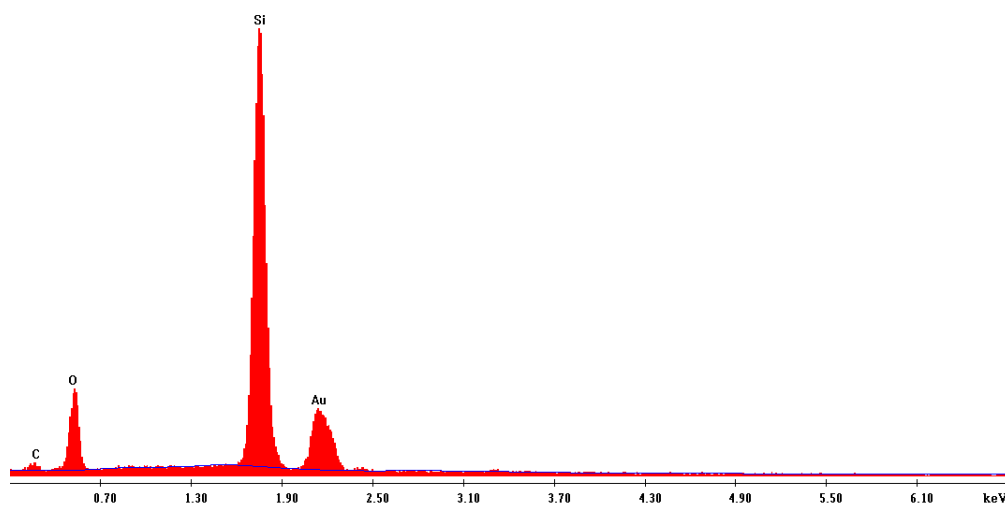

**Fig. S10.** Energy dispersive X-ray spectroscopic analysis (EDX) showing the elemental composition of polymer thermoset cleaved FET substrate.

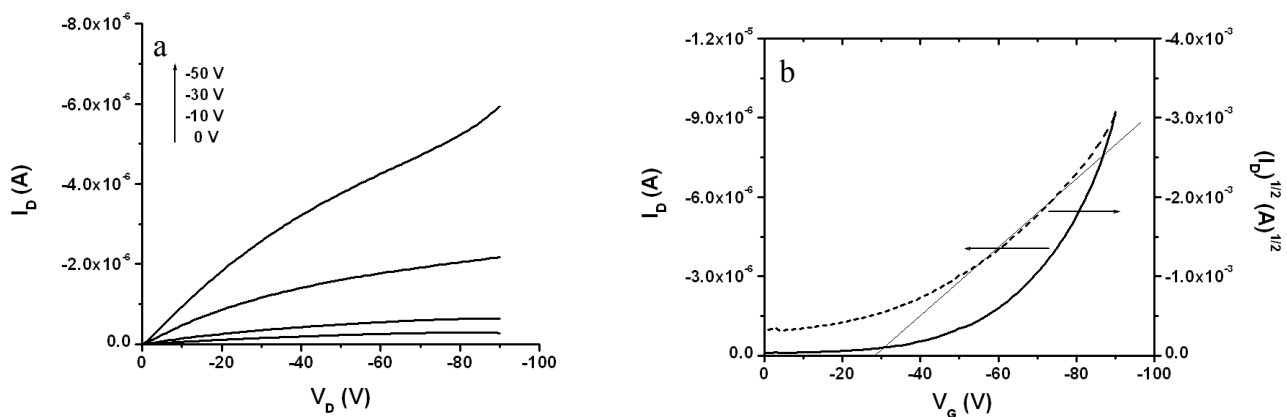

**Fig. S11.** Output (a) and Transfer (b) characteristic I-V curve for P3HT thin films with PMMA layer (After cleaving the thermoset layers).

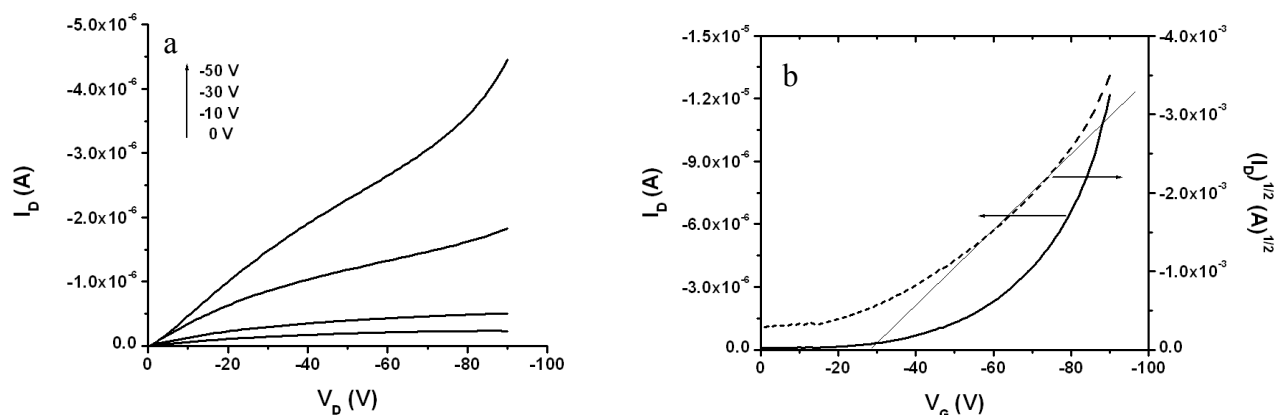

**Fig. S12.** Output (a) and Transfer (b) characteristic I-V curve for P3HT thin films (After removing the PMMA and thermoset layers).

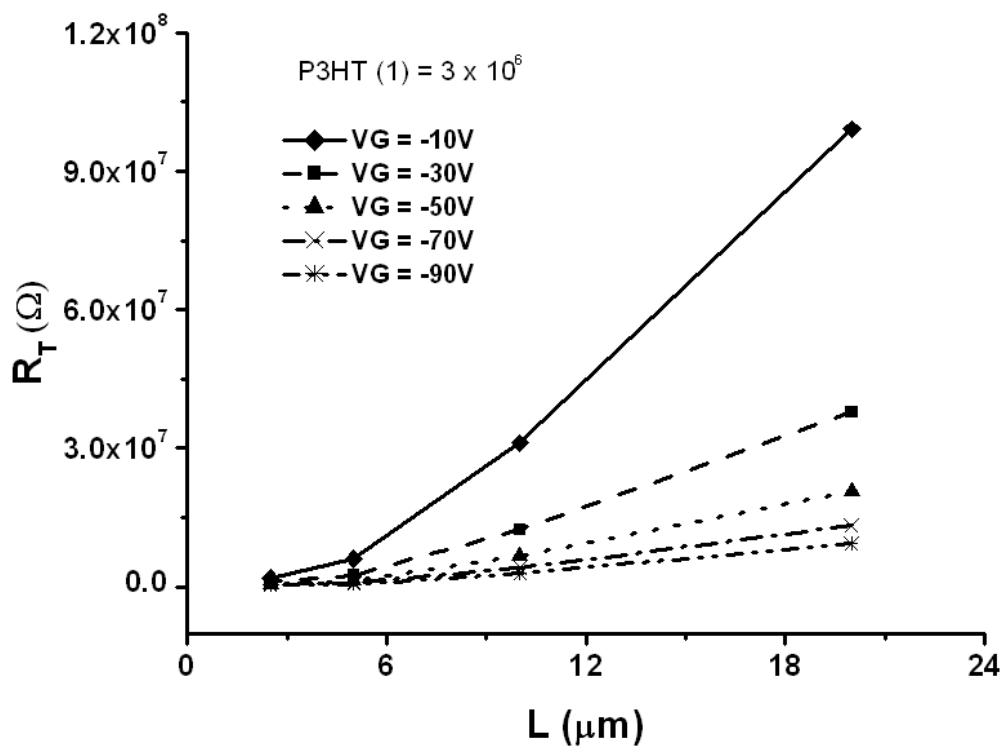

**Fig. S13.** Total resistance ( $R_T$ ) as a function of channel length ( $L$ ) for P3HT films.

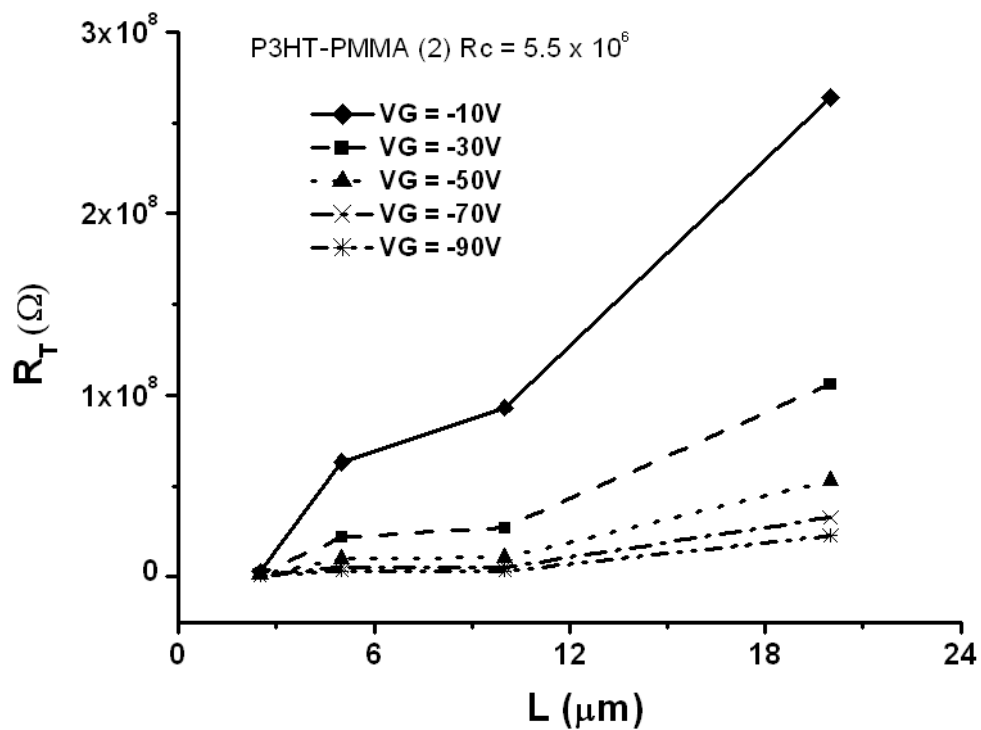

**Fig. S14.** Total resistance ( $R_T$ ) as a function of channel length ( $L$ ) for P3HT films with PMMA coating.

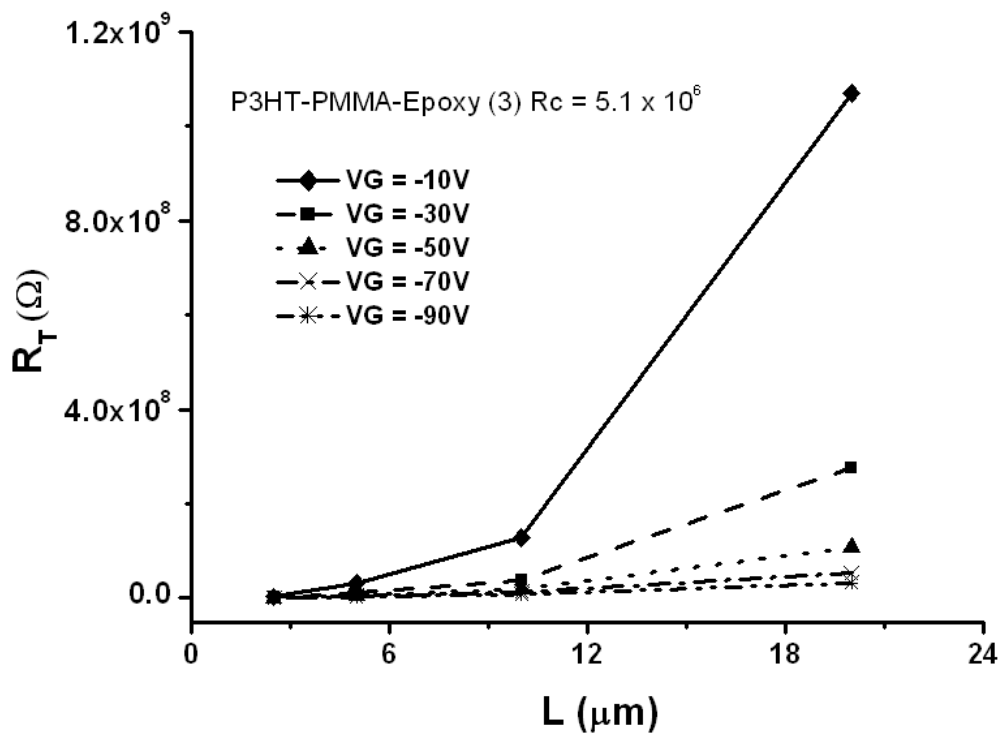

**Fig. S15.** Total resistance ( $R_T$ ) as a function of channel length ( $L$ ) for P3HT films with PMMA and thermoset layers.



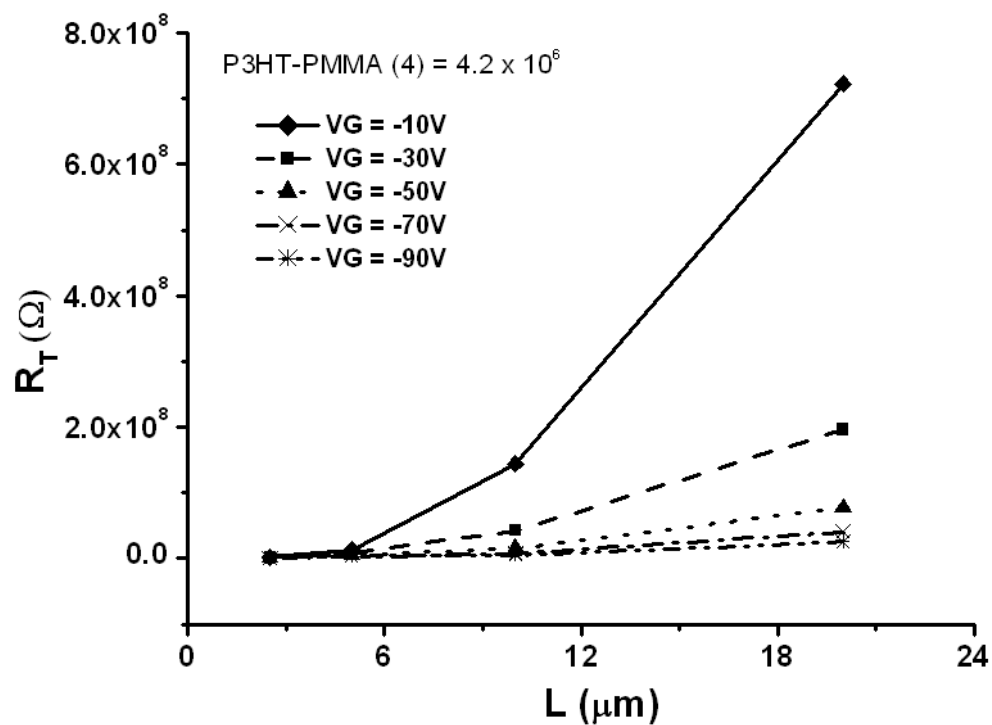

**Fig. S16.** Total resistance ( $R_T$ ) as a function of channel length ( $L$ ) for P3HT films with PMMA (After cleaving the thermoset layers).

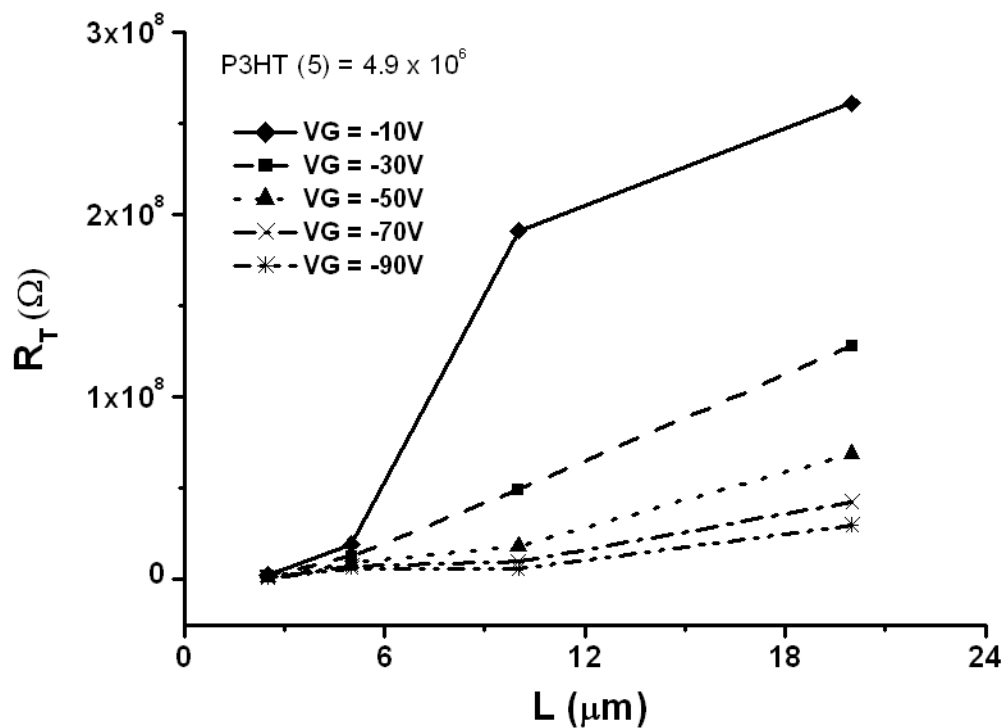

**Fig. S17.** Total resistance ( $R_T$ ) as a function of channel length ( $L$ ) for P3HT films (After removing the PMMA and thermoset layers).

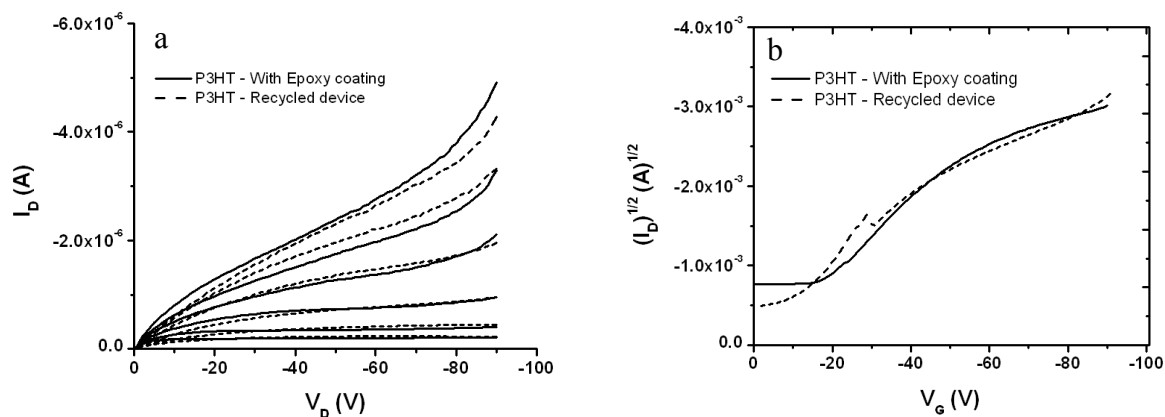

**Fig. S18.** Output (a) and Transfer (b) Characteristic I-V curves for P3HT devices coated with PT and PT cleaved recycled devices.

**Table S1.** Mechanical and thermal properties of polymer thermosets

| S. No | Thermoset | Ratio<br>Cys : Epoxy | $\lambda$         | % Weight loss at temperatures |     |     |     |      |
|-------|-----------|----------------------|-------------------|-------------------------------|-----|-----|-----|------|
|       |           |                      |                   | 0%                            | 25% | 50% | 75% | 100% |
| 1     | PT1       | 1:1                  | $4.6 \times 10^5$ | 233                           | 298 | 353 | 400 | 446  |
| 2     | PT2       | 1:1.5                | $2.0 \times 10^6$ | 202                           | 266 | 342 | 396 | 439  |
| 3     | PT3       | 1:2                  | $6.0 \times 10^6$ | 209                           | 259 | 341 | 392 | 433  |
| 4     | PT4       | 1:2.5                | $6.0 \times 10^6$ | 218                           | 260 | 339 | 390 | 439  |
| 5     | PT5       | 1:3                  | $6.0 \times 10^6$ | 220                           | 274 | 346 | 392 | 440  |
